# Supplementary material for: Co-containing metal–organic framework for high-performance asymmetric supercapacitors with functionalized reduced graphene oxide
Source: Royal Society of Chemistry journal article supplement (doi:10.1039/d3dt02314a), 2023-01-01
Supplement: d3dt02314a1.pdf [file d3dt02314a1.pdf]

*Electronic Supplementary Information (ESI)*

*for*

**Co-Containing Metal-Organic Framework for High-Performance  
Asymmetric Supercapacitor with Functionalized Reduced  
Graphene Oxide**

Soumen Khan,<sup>a,b</sup> Sayan Halder,<sup>a</sup> Santanu Chand,<sup>c</sup> Anup Kumar Pradhan,<sup>a</sup> and Chanchal  
Chakraborty<sup>\*,a,b</sup>

<sup>a</sup> Department of Chemistry, Birla Institute of Technology & Science (BITS) Pilani,  
Hyderabad Campus, Jawaharnagar, Samirpet, Hyderabad, Telangana 500078, India.

<sup>b</sup> Materials Center for Sustainable Energy & Environment (McSEE), Birla Institute of  
Technology and Science, Hyderabad Campus, Hyderabad 500078, India

<sup>c</sup> Department of Applied Chemistry, Graduate School of Engineering, The University of  
Tokyo, Bunkyo-ku, Tokyo 113-8656, Japan

\*Corresponding Author: Chanchal Chakraborty

E-mail: [chanchal@hyderabad.bits-pilani.ac.in](mailto:chanchal@hyderabad.bits-pilani.ac.in)

ORCID ID: <https://orcid.org/0000-0002-4829-1367>

## Synthesis of MOF:

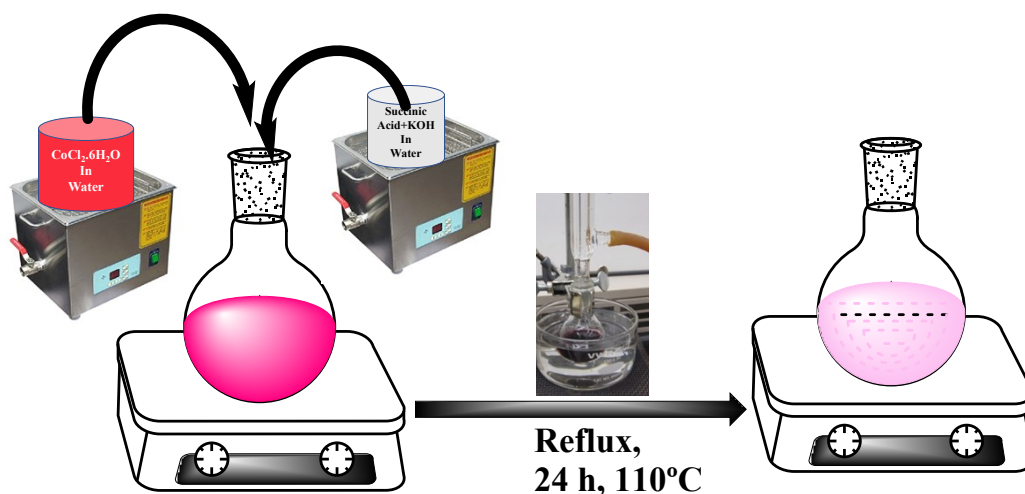

**Scheme. S1** Synthesis of Co-MOF

At first, two 100 ml beaker were taken. 4 g (33.87 mmol) of succinic acid and 3.8 g (67.74 mmol) of KOH were taken in one of the beakers and added with 15 mL of water. The solution was sonicated for 15 min to dissolve the materials to form a completely clear solution. The solution was then transferred into a 100 mL round bottom flask. In another beaker, 8.33 g (35 mmol) cobalt chloride [CoCl<sub>2</sub>.6H<sub>2</sub>O] and 10 mL of water were taken, followed by a sonication of 15 min to make a clear salt solution. The solution was then added drop by drop into that round bottom flask containing the ligand in a stirring condition. After addition, the solution was refluxed at 110°C for 24 hours to prepare the Co-MOF with a 92% yield.<sup>1-3</sup>

### **Reduction and functionalization of GO with PPD:**

To synthesize covalently bonded multi-layered *p*-phenylenediamine (PPD) functionalized reduced graphene oxide, graphene oxide was synthesized first from natural graphite flake using the modified Hummer's method.<sup>4</sup>

To prepare PPD-rGO,<sup>5</sup> GO (60 mg) was dissolved and exfoliated in 120 mL of deionized water through ultrasonication. Subsequently, PPD (600 mg) and NH<sub>3</sub> solution (360 μL) were added. The mixture was refluxed under stirring conditions at 95 °C for 3 h and filtrated with Whatman

41 filter paper. The residue was rinsed in ethanol and poured into ultrasonication for 3 minutes. To remove the physically absorbed PPD, we repeated it at least five times. Finally, the residue was dried in an oven at 80 °C for 24 h.

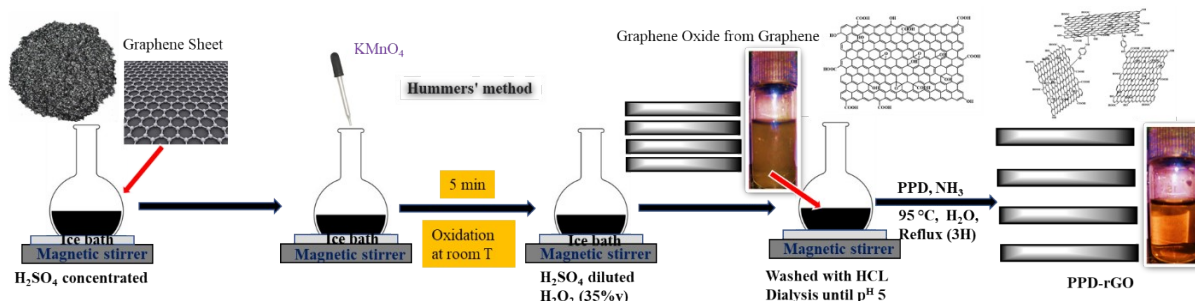

**Scheme. S2** Synthesis of PPD-rGO from graphite flake.

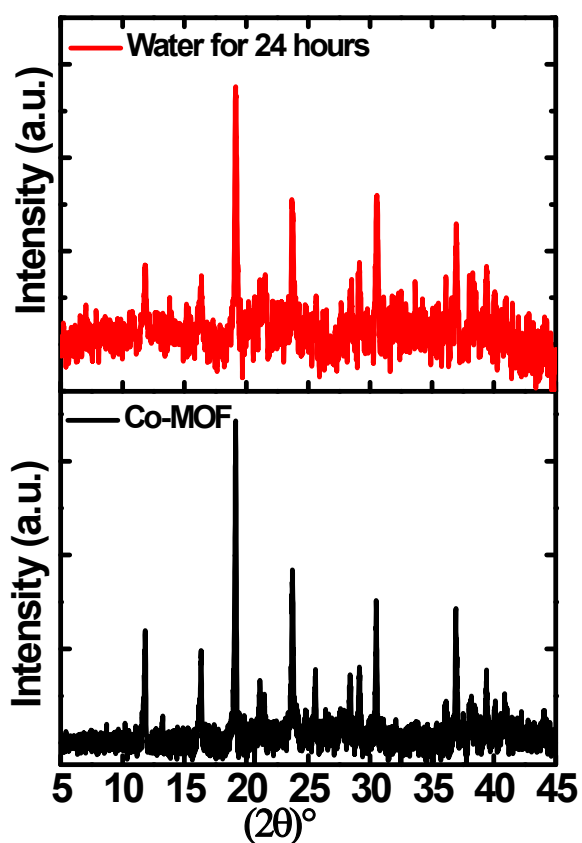

**Fig. S1.** Comparison of XRD pattern of Co-MOF and 24 hours water treated Co-MOF.

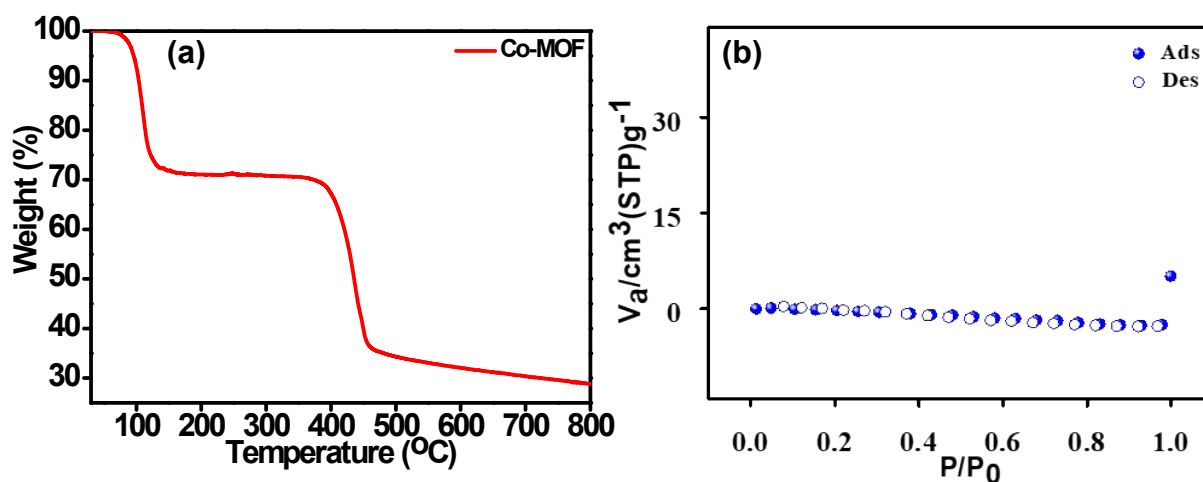

Fig. S2. (a) TGA curve of Co-MOF. (b) N<sub>2</sub> adsorption-desorption isotherm of Co-MOF.

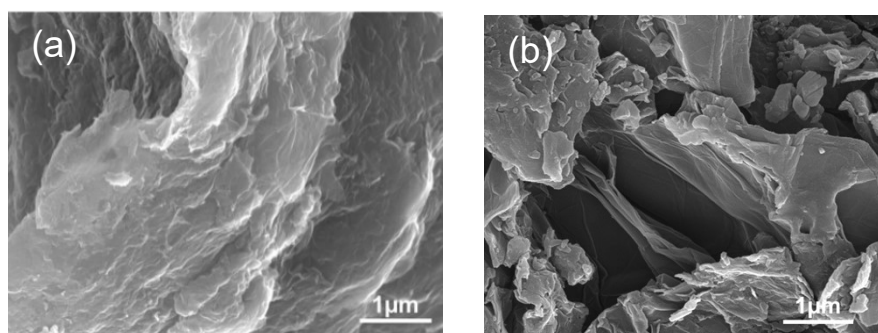

Fig. S3. The FESEM images of (a) GO and (b) PPD-rGO.

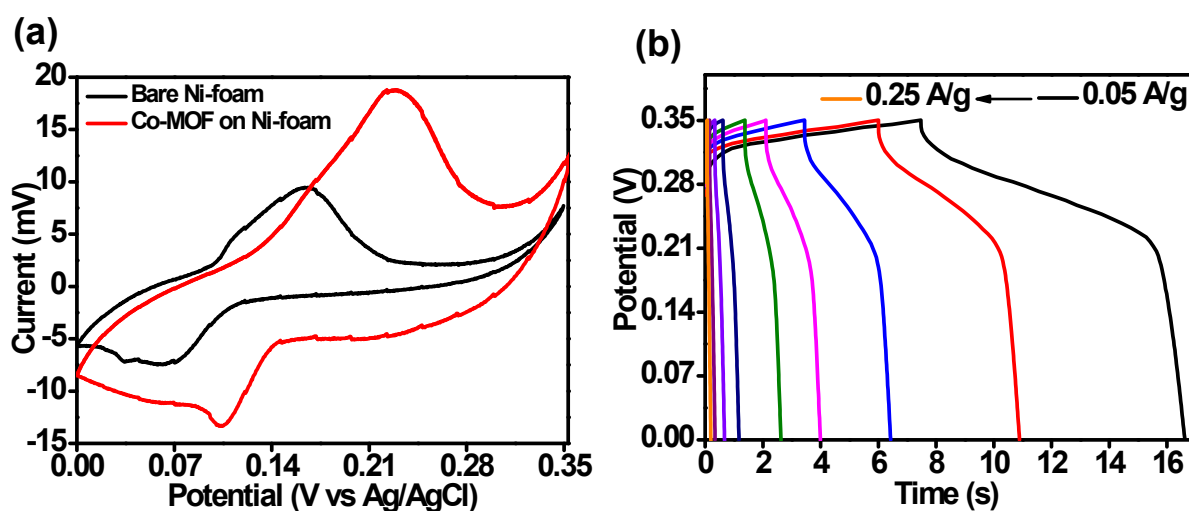

Fig. S4. (a) Comparison of the CV curves of bare Ni-foam and Co-MOF on nickel foam. (b) The GCD plots bare Ni-foam in a three-electrode system at a current density of 0.05 A/g to 0.25 A/g

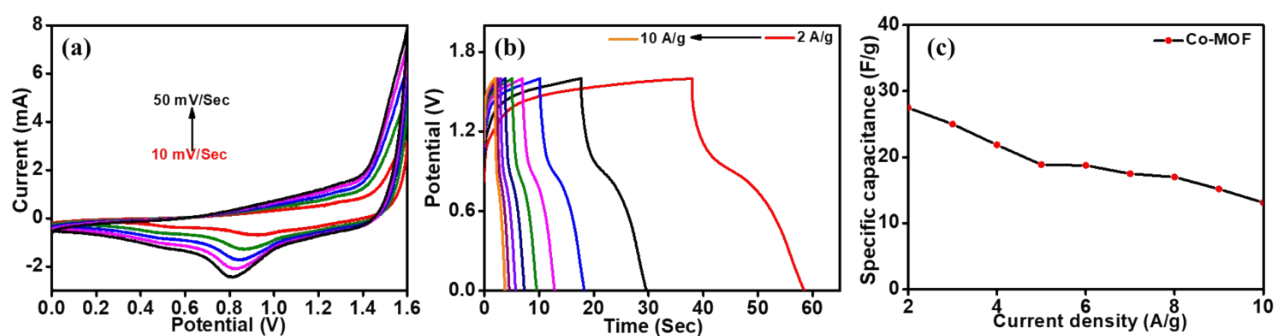

**Fig. S5.** Two electrode CV study of supercapacitor formed by Co-MOF with counter bare Ni-foam electrode: (a) CV curves at different scan rates at 10 mV/s to 50 mV/s; (b) GCD plot at a current density of 2 A g<sup>-1</sup> to 10 A g<sup>-1</sup>; (c) corresponding specific capacitance of the supercapacitor at different current density (2 A g<sup>-1</sup> to 10 A g<sup>-1</sup>) in the two-electrode system.

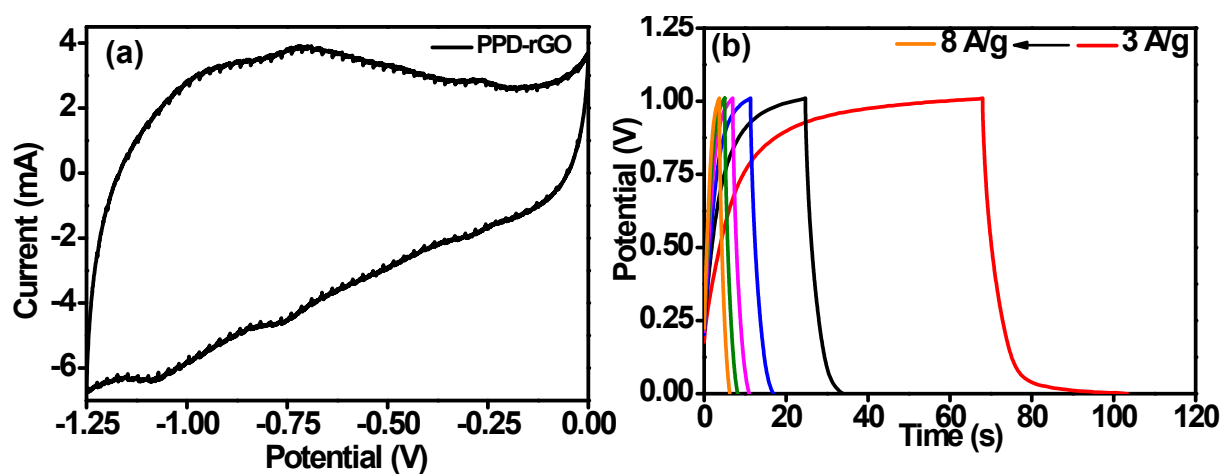

**Fig. S6.** (a) CV curve of PPD-rGO in the potential window of -1.25 V to 0 V. (b) GCD plot PPD-rGO in the current density range of 3-8 A/g in a three-electrode system.

**Table S1.** Comparison of the specific capacitance value of Co-MOF with other reported MOF-based electrodes.

| Materials                                               | Potential window (V) | Electrolyte                           | Specific Capacitance (F g <sup>-1</sup> ) | Current Density (A g <sup>-1</sup> ) | Ref.             |
|---------------------------------------------------------|----------------------|---------------------------------------|-------------------------------------------|--------------------------------------|------------------|
| <b>MOF as electrode material</b>                        |                      |                                       |                                           |                                      |                  |
| 3D Cd-MOF                                               | -0.8 to 0.4 V        | 1 M NaOH/KOH/LiOH                     | 647                                       | 4                                    | [6]              |
| Co-MOF with H <sub>2</sub> tpa and dapz                 | 0-0.5                | 2 M KOH                               | 384                                       | 6                                    | [7]              |
| Zn-MOF                                                  | 0-0.55               |                                       | 377                                       | 1                                    | [8]              |
| 3D Co-MOF with ATA, bpdb                                | 0-0.4                | 6 M KOH                               | 325                                       | 5                                    | [9]              |
| 3D Co-MOF-CoMn <sub>2</sub> O <sub>4</sub>              | 0-0.5                | 2 M KOH                               | 1240                                      | 7                                    | [10]             |
| <b>Co-MOF</b>                                           | <b>0-0.35</b>        | <b>6 M KOH</b>                        | <b>425</b>                                | <b>2</b>                             | <b>This Work</b> |
| <b>MOF@graphene</b>                                     |                      |                                       |                                           |                                      |                  |
| Mo-MeIm derived MoO <sub>3</sub> /RGO                   | 0 - 0.8              | PVA-H <sub>2</sub> SO <sub>4</sub>    | 617                                       | 1                                    | [11]             |
| Cu-MOF@rGO                                              | -1-0.2               | 1 M Na <sub>2</sub> SO <sub>4</sub>   | 375                                       | 2                                    | [12]             |
| Cu-MOF/rGO (SD)                                         | -0.5-0.7             | 1 M Na <sub>2</sub> SO <sub>4</sub>   | 685.33                                    | 1.6                                  | [13]             |
| rGO/HKUST-1                                             | -0.1-1               | 0.5 M Na <sub>2</sub> SO <sub>4</sub> | 385                                       | 1                                    | [14]             |
| Co-MOF-RGO                                              | 0 - 0.6              | 6 M KOH                               | 430                                       | 1                                    | [15]             |
| Mn BTC derived Mn <sub>3</sub> O <sub>4</sub> /Graphene | -0.1 - 0.9           | 1 M Na <sub>2</sub> SO <sub>4</sub>   | 456                                       | 1                                    | [16]             |
| <b>Co-MOF</b>                                           | <b>0-0.35</b>        | <b>6 M KOH</b>                        | <b>425</b>                                | <b>2</b>                             | <b>This Work</b> |

**Table S2.** Comparison of ED and PD of our ASC with other reports.

| <b>Materials</b>                           | <b>Counter Materials</b>         | <b>ED (Whkg<sup>-1</sup>)</b> | <b>PD (kWkg<sup>-1</sup>)</b> | <b>References</b> |
|--------------------------------------------|----------------------------------|-------------------------------|-------------------------------|-------------------|
| 3D Cd-MOF                                  | Activated carbon (AC)            | 11.25                         | 0.50                          | [6]               |
| Co-Ni-MOF                                  | AC                               | 20.94                         | 0.75                          | [17]              |
| Co-MOF with H <sub>2</sub> tpa and dapz    | AC                               | 24.13                         | 4.42                          | [7]               |
| Zn-MOF                                     | AC                               | 13.3                          | 7.44                          | [8]               |
| 3D Co-MOF with ATA, bpdb                   | AC                               | 50.03                         | 2.31                          | [9]               |
| Cu-atrz-BDC                                | rGO                              | 9.96                          | 0.00081                       | [18]              |
| Ni-MOF-derived nickel phosphate            | Ni-MOF-derived nickel phosphate  | 8                             | 0.5                           | [19]              |
| Ce-MOF/GO                                  | Pt-wire                          | 11.96                         | 4.497                         | [20]              |
| Co(OH) <sub>2</sub> -Derived MOF           | Co(OH) <sub>2</sub> -Derived MOF | 13.3                          | 24.00                         | [21]              |
| 3D Co-MOF-CoMn <sub>2</sub> O <sub>4</sub> | AC                               | 38.54                         | 3.21                          | [10]              |
| <b>Co-MOF</b>                              | <b>PPD-rGO</b>                   | <b>25.8 (max.)</b>            | <b>11.9 (max.)</b>            | <b>This Work</b>  |

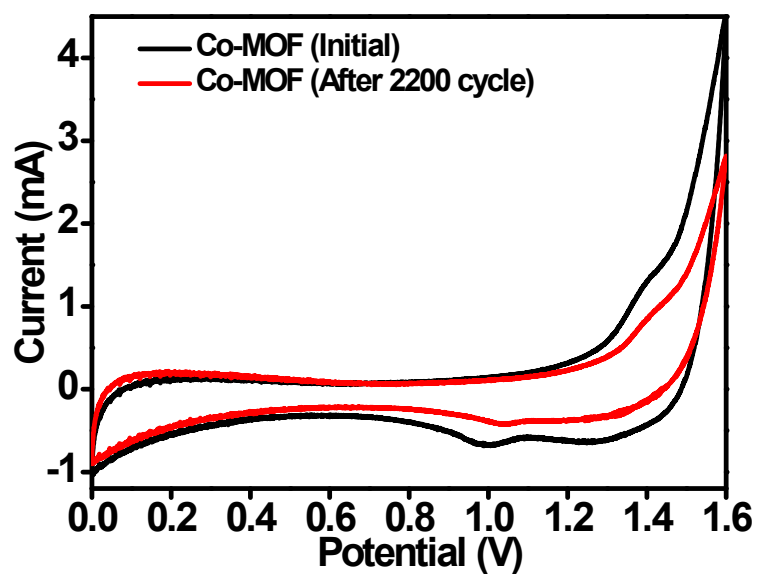

Fig. S7. CV curve after 2200 GCD cycle performance.

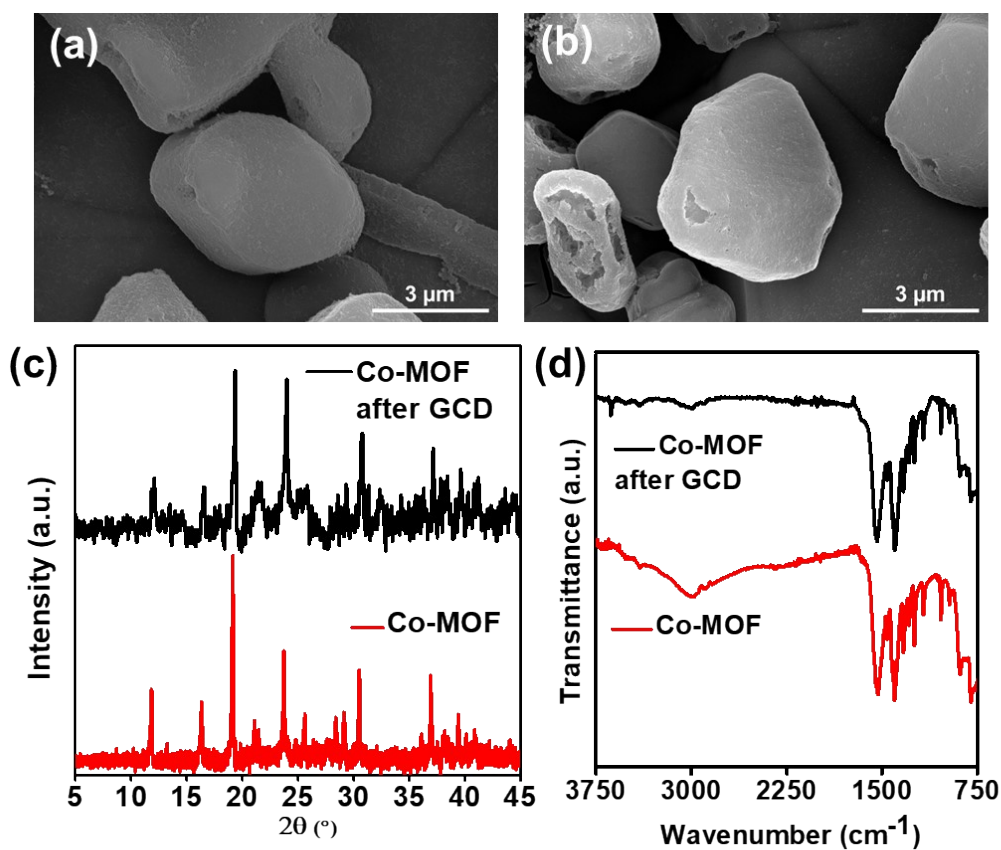

Fig. S8. The SEM images of Co-MOF (a) before and (b) after 2200 GCD cycles. The (c) PXRD and (d) FTIR study of Co-MOF before and after the GCD studies.



## References

1. C. Livage, C. Egger, and G. Ferey, Hydrothermal versus nonhydrothermal synthesis for the preparation of organic–inorganic solids: the example of cobalt (II) succinate. *Chem. Mater.*, 2001, **13**, 410-414.
2. Z. H. Zhou, J. M. Yang, and H. L. Wan, Diamine substitution reactions of tetrahydrate succinato nickel, cobalt, and zinc coordination polymers. *Crystal Growth & Design.*, 2005, **5**, 1825-1830.
3. T. M. Li, J. H. Han, B. Q. Hu, F. Yu, and B. Li, A highly active oxygen evolution electrocatalyst derived from Co/Ni-succinic acid framework under mild conditions. *CrystEngComm*, 2022, **24**, 1453-1458.
4. B. Paulchamy, G. Arthi, and B. D. Lignesh, A simple approach to stepwise synthesis of graphene oxide nanomaterial. *J. Nanomed. Nanotechnol.*, 2015, **6**,1.
5. H. L. Ma, H. B. Zhang, Q. H. Hu, W. J. Li, Z. G. Jiang, Z. Z. Yu, and A. Dasari, Functionalization and reduction of graphene oxide with p-phenylene diamine for electrically conductive and thermally stable polystyrene composites. *ACS Appl. Mater. Interfaces.*, 2012, **4**, 1948-1953.
6. R. Deka, R. Rajak, V. Kumar, and S. M. Mobin, Effect of Electrolytic Cations on a 3D Cd-MOF for Supercapacitive Electrodes. *Inorg. Chem.*, 2023, **62**, 3084-3094.
7. S. Sanati, R. Abazar, A. Morsali, A. M. Kirillov, P. C. Junk, and J. Wang, An asymmetric supercapacitor based on a non-calcined 3D pillared cobalt (II) metal–organic framework with long cyclic stability. *Inorg. Chem.*, 2019, **58**, 16100-16111.
8. T. K. Ghosh, and G. R. Rao, Design and synthesis of mixed-ligand architected Zn-based coordination polymers for energy storage. *Dalton Trans.*, 2023, **52**, 5943-5955.
9. R. Abazari, S. Sanati, A. Morsali, A. Slawin, and C. L. Carpenter-Warren, Dual-purpose 3D pillared metal–organic framework with excellent properties for catalysis of

- oxidative desulfurization and energy storage in asymmetric supercapacitor. *ACS Appl. Mater. Interfaces.*, 2019, **11**, 14759-14773.
10. R. Abazari, S. Sanati, A. Morsali, and D. P. Dubal, High specific capacitance of a 3D-metal-organic framework-confined growth in CoMn<sub>2</sub>O<sub>4</sub> nanostars as advanced supercapacitor electrode materials. *J. Mater. Chem.*, 2021, **9**, 11001-11012.
  11. X. Cao, B. Zheng, W. Shi, J. Yang, Z. Fan, Z. Luo, X. Rui, B. Chen, Q. Yan, H. Zhang, Reduced Graphene Oxide-Wrapped MoO<sub>3</sub> Composites Prepared by Using Metal-Organic Frameworks as Precursor for All-Solid-State Flexible Supercapacitors, *Adv. Mater.*, 2015, **27**, 4695-4701.
  12. A.K. Gupta, M. Saraf, P.K. Bharadwaj, S.M. Mobin, Dual Functionalized CuMOF-Based Composite for High-Performance Supercapacitors, *Inorg. Chem.*, 2019, **58**, 9844-9854.
  13. M. Saraf, R. Rajak, S.M. Mobin, A fascinating multitasking Cu-MOF/rGO hybrid for high performance supercapacitors and highly sensitive and selective electrochemical nitrite sensors, *J. Mater. Chem. A*, 2016, **4**, 16432-16445.
  14. P. Srimuk, S. Luanwuthi, A. Krittayavathananon, M. Sawangphruk, Solid-type supercapacitor of reduced graphene oxide-metal organic framework composite coated on carbon fiber paper, *Electrochim. Acta*, 2015, **157**, 69-77.
  15. M.S. Rahmanifar, H. Hesari, A. Noori, M.Y. Masoomi, A. Morsali, M.F. Mousavi, A dual Ni/Co-MOF-reduced graphene oxide nanocomposite as a high performance supercapacitor electrode material, *Electrochim. Acta*, 2018, **275**, 76-86.
  16. K. Zhao, K. Lyu, S. Liu, Q. Gan, Z. He, Z. Zhou, Ordered porous Mn<sub>3</sub>O<sub>4</sub>@N-doped carbon/graphene hybrids derived from metal-organic frameworks for supercapacitor electrodes, *J. Mater. Sci.*, 2017, **52**, 446-457.

17. *Inorg. Chem.*, 2019, **58**, 16100-16111J. Sun, X. Yu, S. Zhao, H. Chen, K. Tao, and L. Han, Solvent-Controlled Morphology of Amino-Functionalized Bimetal Metal–Organic Frameworks for Asymmetric Supercapacitors. *Inorg. Chem.*, 2020, **59**, 11385-11395.
18. Ma, Y., Gao, G., Su, H., Rong, H., Lai, L. and Liu, Q., A Cu<sub>4</sub> cluster-based MOF as a supercapacitor electrode material with ultrahigh capacitance. *Ionics*, 2021, **27**, 1699-1707.
19. R. Bendi, V. Kumar, V. Bhavanasi, K. Parida and P. S. Lee, Metal organic framework-derived metal phosphates as electrode materials for supercapacitors. *Adv. Energy Mater.*, 2016, **6**, 1501833.
20. R. Ramachandran, W. Xuan, C. Zhao, X. Leng, D. Sun, D. Luo, and F. Wang, Enhanced electrochemical properties of cerium metal–organic framework based composite electrodes for high-performance supercapacitor application. *RSC Adv.*, 2018, **8**, 3462-3469.
21. T. Deng, Y. Lu, W. Zhang, M. Sui, X. Shi, D. Wang, and W. Zheng, Inverted Design for High-Performance Supercapacitor Via Co(OH)<sub>2</sub>-Derived Highly Oriented MOF Electrodes. *Adv. Energy Mater.*, 2018, **8**, 1702294.
